# Supplementary material for: Statistical and Machine Learning-Driven Optimization of Mechanical Properties in Designing Durable HDPE Nanobiocomposites
Source: MDPI journal article supplement (doi:10.3390/polym13183100), 2021-09-15
Supplement: s1 [file s1]

**Supplementary Figures:**

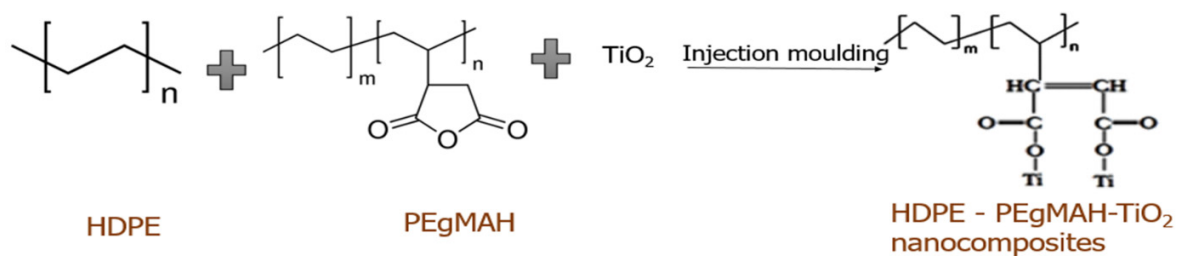

**Figure S1.** Schematic illustration of HDPE- $\text{TiO}_2$  grafting with maleic anhydride

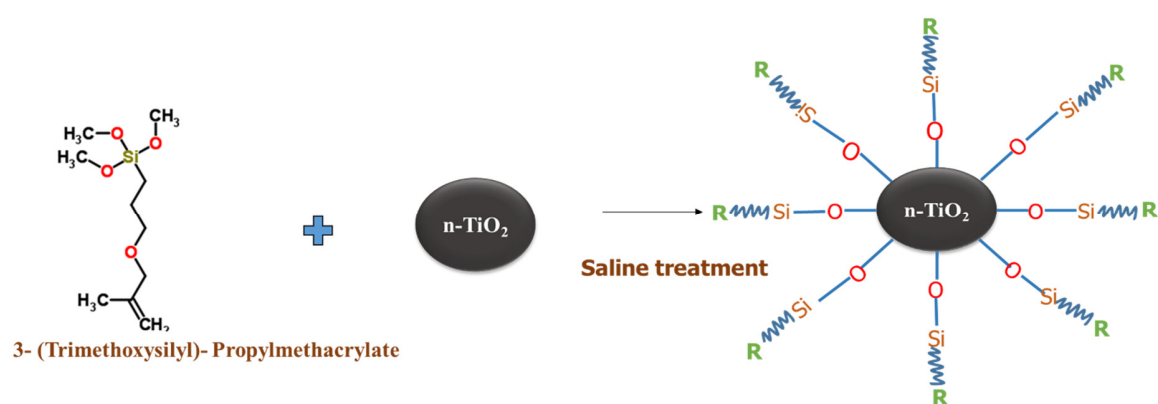

**Figure S2:** Schematic representation of the binding mechanism of  $\text{TiO}_2$  to saline coupling agent (MPS).

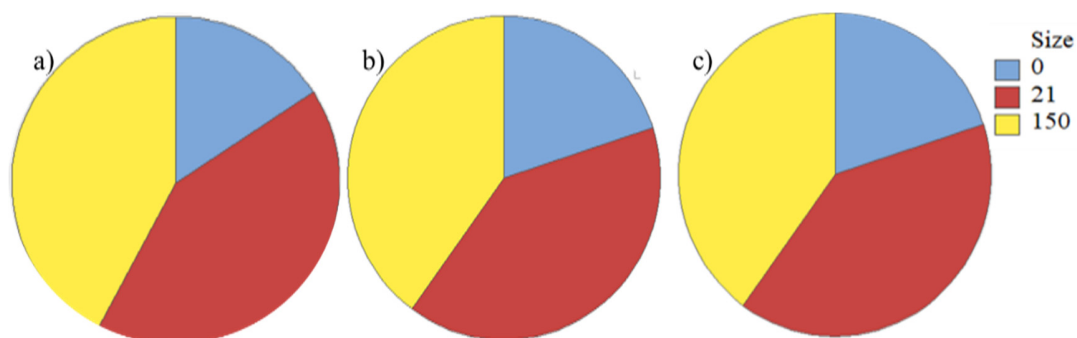

**Figure S3.** Pie chart showing the influence of the factor (nanoparticles' size) on: a) fracture strength b) yield strength and c) Young's modulus.

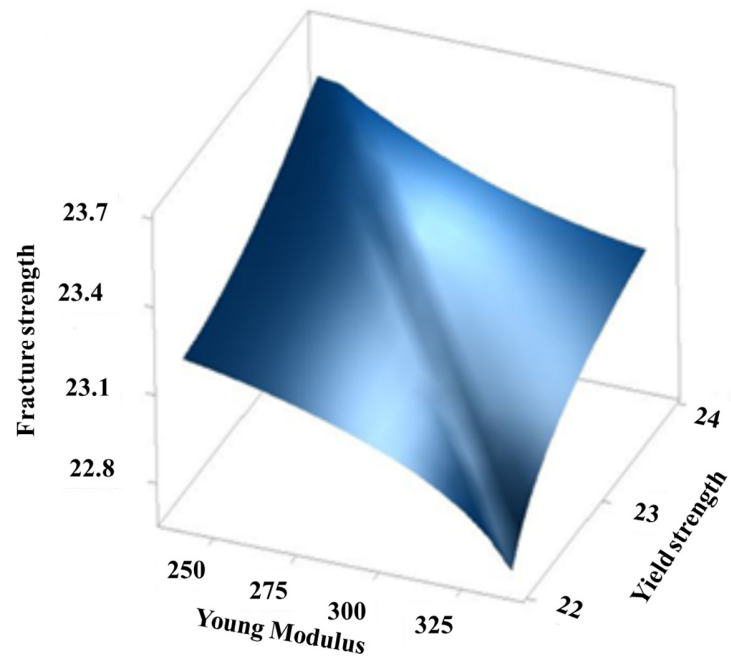

**Figure S4.** Surface plot comparison between the responses using RSM-GA.

### Supplementary Tables:

**Table S1.** Factors and levels used for ANOVA analysis.

| Samples | Factors                                   | Abbreviation          | Number of levels | Level 1 | Level 2 |
|---------|-------------------------------------------|-----------------------|------------------|---------|---------|
| A       | Titanium dioxide nanofillers (%)          | n-TiO <sub>2</sub>    | 2                | 0       | 5       |
| B       | Modified titanium dioxide (%)             | M-(TiO <sub>2</sub> ) | 2                | 0       | 5       |
| C       | Size of the nanoparticles (nm)            | Nm                    | 2                | 21      | 150     |
| D       | Polyethylene grafted maleic anhydride (%) | PEgMAH                | 2                | 0       | 3       |
| E       | Cellulose nanocrystals (%)                | n-CNC                 | 2                | 0       | 5       |

**Table S2.** Working parameters for ANN model.

| Variables                  | Parameter                           |
|----------------------------|-------------------------------------|
| Hidden Layer               | 1- 20 neurons                       |
| Method                     | Feed forward back propagation       |
| Function                   | Tansig                              |
| Adaption learning function | Levenberg-Marquardt backpropagation |
| Performance function       | Mean square error                   |
| Maximum number of epochs   | 1000-2000                           |
| Mu                         | 0.01                                |
| Mu (max)                   | 10000000000                         |
| Gradient                   | 1e-05-1e-07                         |

**Table S3.** Working parameters for GA-ANN model.

| <b>Variables</b>           | <b>Parameter</b>    |
|----------------------------|---------------------|
| Hidden Neurons             | 1- 20 neurons       |
| Hidden neurons             | 2                   |
| Function                   | Tansig              |
| Adaption learning function | Levenberg-Marquardt |
|                            | backpropagation     |
| Performance function       | Mean square error   |
| Order of selection         | Simulated annealing |
| Maximum number of epochs   | 1000-2000           |
| Mu                         | 0.01                |
| Populations                | 150                 |
| Learning rate              | Medium              |
| Mutation rate              | Medium              |
| Trail No                   | 1-10                |
| Maximum generation         | 150                 |

Table S4. Summary of ANOVA results for yield strength.

| Analysis of Variance of Yeild strength |        |           |              |            |         |         |         |
|----------------------------------------|--------|-----------|--------------|------------|---------|---------|---------|
| Source                                 | DF     | Seq SS    | Contribution | Adj SS     | Adj MS  | F-Value | P-Value |
| TiO2                                   | 1      | 4.055     | 1.81%        | 15.243     | 15.243  | 18.77   | 0.000   |
| m-TiO2                                 | 1      | 12.995    | 5.79%        | 12.995     | 12.995  | 16.00   | 0.000   |
| PEgMAH                                 | 1      | 0.174     | 0.08%        | 0.845      | 0.845   | 1.04    | 0.313   |
| NCC                                    | 1      | 134.976   | 60.11%       | 105.536    | 105.536 | 129.95  | 0.000   |
| TiO2*PEgMAH                            | 1      | 1.601     | 0.71%        | 0.107      | 0.107   | 0.13    | 0.719   |
| TiO2*NCC                               | 1      | 3.577     | 1.59%        | 0.426      | 0.426   | 0.52    | 0.472   |
| m-TiO2*PEgMAH                          | 1      | 3.627     | 1.62%        | 3.627      | 3.627   | 4.47    | 0.040   |
| m-TiO2*NCC                             | 1      | 1.290     | 0.57%        | 1.290      | 1.290   | 1.59    | 0.214   |
| PEgMAH*NCC                             | 1      | 17.429    | 7.76%        | 7.508      | 7.508   | 9.24    | 0.004   |
| TiO2*PEgMAH*NCC                        | 1      | 0.002     | 0.00%        | 2.704      | 2.704   | 3.33    | 0.074   |
| m-TiO2*PEgMAH*NCC                      | 1      | 5.825     | 2.59%        | 5.825      | 5.825   | 7.17    | 0.010   |
| Error                                  | 48     | 38.983    | 17.36%       | 38.983     | 0.812   |         |         |
| Total                                  | 59     | 224.535   | 100.00%      |            |         |         |         |
| Model Summary                          |        |           |              |            |         |         |         |
| S                                      | R-sq   | R-sq(adj) | PRESS        | R-sq(pred) |         |         |         |
| 0.901196                               | 82.64% | 78.66%    | 62.0051      | 72.39%     |         |         |         |

Table S5. Summary of ANOVA results for fracture strength.

| Analysis of Variance |        |           |              |            |         |         |         |
|----------------------|--------|-----------|--------------|------------|---------|---------|---------|
| Source               | DF     | Seq SS    | Contribution | Adj SS     | Adj MS  | F-Value | P-Value |
| Model                | 11     | 122.662   | 83.08%       | 122.662    | 11.1511 | 20.09   | 0.000   |
| Linear               | 5      | 93.872    | 63.58%       | 88.096     | 17.6193 | 31.74   | 0.000   |
| TIO2                 | 1      | 1.204     | 0.82%        | 12.163     | 12.1634 | 21.91   | 0.000   |
| M-TiO2               | 1      | 1.229     | 0.83%        | 6.560      | 6.5600  | 11.82   | 0.001   |
| SIZE                 | 1      | 11.117    | 7.53%        | 9.813      | 9.8133  | 17.68   | 0.000   |
| PEGMAH               | 1      | 6.103     | 4.13%        | 0.578      | 0.5779  | 1.04    | 0.313   |
| NCC                  | 1      | 74.219    | 50.27%       | 66.247     | 66.2470 | 119.36  | 0.000   |
| 2-Way Interactions   | 6      | 28.791    | 19.50%       | 28.791     | 4.7984  | 8.65    | 0.000   |
| TIO2*SIZE            | 1      | 3.497     | 2.37%        | 2.115      | 2.1154  | 3.81    | 0.057   |
| TIO2*PEGMAH          | 1      | 2.409     | 1.63%        | 17.113     | 17.1131 | 30.83   | 0.000   |
| TIO2*NCC             | 1      | 4.244     | 2.87%        | 6.735      | 6.7345  | 12.13   | 0.001   |
| M-TiO2*PEGMAH        | 1      | 15.746    | 10.67%       | 18.123     | 18.1233 | 32.65   | 0.000   |
| M-TiO2*NCC           | 1      | 0.901     | 0.61%        | 1.822      | 1.8220  | 3.28    | 0.077   |
| PEGMAH*NCC           | 1      | 1.993     | 1.35%        | 1.993      | 1.9933  | 3.59    | 0.065   |
| Error                | 45     | 24.977    | 16.92%       | 24.977     | 0.5550  |         |         |
| Lack-of-Fit          | 6      | 12.790    | 8.66%        | 12.790     | 2.1317  | 6.82    | 0.000   |
| Pure Error           | 39     | 12.187    | 8.25%        | 12.187     | 0.3125  |         |         |
| Total                | 56     | 147.639   | 100.00%      |            |         |         |         |
| Model Summary        |        |           |              |            |         |         |         |
| S                    | R-sq   | R-sq(adj) | PRESS        | R-sq(pred) |         |         |         |
| 0.745008             | 83.08% | 78.95%    | 38.7158      | 73.78%     |         |         |         |

TableS6. Summary of ANOVA results for Young's modulus.

| Analysis of Variance of Young's Modulus |        |           |              |            |        |         |         |
|-----------------------------------------|--------|-----------|--------------|------------|--------|---------|---------|
| Source                                  | DF     | Seq SS    | Contribution | Adj SS     | Adj MS | F-Value | P-Value |
| Tio2                                    | 1      | 2029      | 0.15%        | 22611      | 22611  | 4.27    | 0.044   |
| m-tio2                                  | 1      | 76133     | 5.49%        | 76133      | 76133  | 14.36   | 0.000   |
| PEgMAH                                  | 1      | 19110     | 1.38%        | 10385      | 10385  | 1.96    | 0.168   |
| NCC                                     | 1      | 698212    | 50.37%       | 475922     | 475922 | 89.77   | 0.000   |
| Tio2*PEgMAH                             | 1      | 3534      | 0.25%        | 3855       | 3855   | 0.73    | 0.398   |
| Tio2*NCC                                | 1      | 153575    | 11.08%       | 72447      | 72447  | 13.67   | 0.001   |
| m-tio2*PEgMAH                           | 1      | 711       | 0.05%        | 711        | 711    | 0.13    | 0.716   |
| m-tio2*NCC                              | 1      | 1184      | 0.09%        | 1184       | 1184   | 0.22    | 0.639   |
| PEgMAH*NCC                              | 1      | 25027     | 1.81%        | 85148      | 85148  | 16.06   | 0.000   |
| Tio2*PEgMAH*NCC                         | 1      | 101163    | 7.30%        | 150302     | 150302 | 28.35   | 0.000   |
| m-tio2*PEgMAH*NCC                       | 1      | 51044     | 3.68%        | 51044      | 51044  | 9.63    | 0.003   |
| Error                                   | 48     | 254471    | 18.36%       | 254471     | 5301   |         |         |
| Lack-of-Fit                             | 8      | 154426    | 11.14%       | 154426     | 19303  | 7.72    | 0.000   |
| Pure Error                              | 40     | 100045    | 7.22%        | 100045     | 2501   |         |         |
| Total                                   | 59     | 1386192   | 100.00%      |            |        |         |         |
| Model Summary                           |        |           |              |            |        |         |         |
| S                                       | R-sq   | R-sq(adj) | PRESS        | R-sq(pred) |        |         |         |
| 72.8112                                 | 81.64% | 77.44%    | 395858       | 71.44%     |        |         |         |

Table S7. Summarized data containing weights and biases of the neural networks.

| Neural network weight and bias for Fracture strength |          |           |          |          |
|------------------------------------------------------|----------|-----------|----------|----------|
| IW                                                   | LW       | B1        | B2       |          |
| 1.3208                                               | -4.3184  | 0.29061   | -4.3173  | -0.57446 |
| -1.2033                                              | 3.9163   | 0.74794   | 3.7739   |          |
| 0.26228                                              | 4.4169   | 0.40458   | -2.4685  |          |
| -4.2226                                              | -0.59281 | -0.15949  | 1.6306   |          |
| -4.4142                                              | 0.22458  | -0.59125  | -0.02313 |          |
| -3.7963                                              | -2.3729  | 0.77764   | -0.748   |          |
| -2.9371                                              | 3.2325   | 0.22993   | -1.5984  |          |
| -4.152                                               | -1.5608  | -0.93387  | -2.3719  |          |
| -2.7258                                              | -3.1213  | 0.0074522 | -3.6727  |          |
| -1.2148                                              | 4.0949   | 0.13766   | -4.5888  |          |

**Neural network weight and bias for Yield strength**

| IW       |         | LW       | B1       | B2      |
|----------|---------|----------|----------|---------|
| -1.526   | 4.023   | 2.1164   | 4.553    | -1.1197 |
| -0.22131 | 4.5498  | -0.38493 | -3.5078  |         |
| 0.28086  | 4.3132  | -0.05222 | -2.3219  |         |
| 4.1682   | -0.2297 | 1.7839   | -2.5589  |         |
| 4.2438   | 0.42192 | -1.1408  | -0.13543 |         |
| 1.9429   | -3.9596 | 0.12785  | 0.80051  |         |
| -2.4126  | -3.3307 | 0.4491   | -2.5417  |         |
| 4.7969   | 0.31626 | 1.3294   | 1.873    |         |
| 0.71493  | -4.7666 | -0.44633 | 2.8774   |         |
| -1.9091  | 4.2094  | 0.96401  | -4.2162  |         |

**Neural network's weight and bias for Young Modulus**

| IW      |          | LW       | B1       | B2       |
|---------|----------|----------|----------|----------|
| 2.8004  | -3.1176  | 0.36823  | -4.6656  | -0.71739 |
| 3.1357  | 3.0576   | 0.56977  | -3.4973  |          |
| -3.0049 | 3.3767   | 1.0615   | 2.32     |          |
| 4.4383  | -0.22631 | 0.7899   | -1.3553  |          |
| 1.7816  | 4.0579   | 0.47505  | -0.39927 |          |
| -3.3798 | -2.8729  | 0.8244   | -0.50857 |          |
| -4.0678 | -1.7276  | 0.17344  | -1.4977  |          |
| 0.61389 | 4.3956   | -0.54349 | 2.4711   |          |
| 3.7662  | 2.0965   | 0.42818  | 3.5398   |          |

---

3.8071

3.4052

0.82552

3.5591

---
